# Supplementary material for: Analyses of different propagation models for the estimation of the topside ionosphere and plasmasphere with an Ensemble Kalman Filter
Source: Copernicus journal article supplement (doi:10.5194/angeo-2020-39), 2020-06-23
Supplement: Supplementary file [file angeo-2020-39-RC2-supplement.pdf]

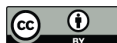

# 1 Analyses of different propagation models for the estimation of 2 the topside ionosphere and plasmasphere with an Ensemble 3 Kalman Filter

4 Tatjana Gerzen<sup>1</sup>, David Minkwitz<sup>2</sup>, Michael Schmidt<sup>1</sup>, Eren Erdogan<sup>1</sup>

5 <sup>1</sup> Technical University Munich (TUM), Deutsches Geodätisches Forschungsinstitut (DGFI), Arcisstr. 21, Munich,  
6 Germany

7 <sup>2</sup> Airbus Defence and Space, Robert-Koch-Str. 1, Taufkirchen, Germany

8 Correspondence to: Tatjana Gerzen (tatjana.gerzen@tum.de)

## 9 Abstract.

10 The accuracy and availability of satellite-based applications like GNSS positioning and remote sensing crucially  
11 depends on the knowledge of the ionospheric electron density distribution. The tomography of the ionosphere is  
12 one of the major tools to provide link specific ionospheric corrections as well as to study and monitor physical  
13 processes in the ionosphere and plasmasphere. In this work, we apply an Ensemble Kalman Filter (EnKF) approach  
14 for the 4D electron density reconstruction of the topside ionosphere and plasmasphere with the focus on the  
15 investigation of different propagation models and compare them with the iterative reconstruction technique  
16 SMART+. The STEC measurements of ~~eleven~~ LEO satellites are assimilated into the reconstructions. We conduct  
17 a case study on a global grid with altitudes between 430 and 20200 km, for two periods of the year 2015 covering  
18 quiet to perturbed ionospheric conditions. ~~Particularly,~~ The performance of the methods to estimate independent  
19 STEC and electron density measurements from the three Swarm satellites ~~is~~ <sup>are</sup> analysed. The results indicate that the  
20 ~~methods~~ EnKF with ~~f~~ exponential decay as the propagation model and SMART+ perform best, providing ~~in~~  
21 ~~summary~~ the lowest residuals.

## 22 1 Introduction

23 The ionosphere is the ~~upper~~ <sup>charged</sup> part of the atmosphere extending from about 50 - 1000 km and going over in the  
24 plasmasphere. The characteristic property of the ionosphere is that it contains sufficient free electrons to affect the  
25 ~~radio waves~~ propagation of trans-ionospheric radio signals, ~~as~~ from telecommunication, navigation or remote  
26 sensing satellites, by refraction, diffraction and scattering.

27 Therefore, the knowledge of the three-dimensional electron density distribution and ~~their~~ <sup>its</sup> dynamics are of practical  
28 importance. Around 50% of the signal delays or range errors of L-band signals used in GNSS originate from  
29 altitudes above the ionospheric F2 layer, which consist of topside ionosphere going over into the plasmasphere.

30 So far, especially the topside ionosphere and plasmasphere is not well described. <sup>reference for this</sup> ~~bit 'clonky' should be reworded~~

31 The choice of the ionospheric correction model has an ~~essential~~ <sup>major</sup> impact on the accuracy of the estimated  
32 ionospheric delay and its uncertainties. A widely used approach for ionospheric modelling is the single-layer  
33 model, whereby the ionosphere is projected onto a two-dimensional <sup>(reference)</sup> spherical layer, typically located between  
34 350 and 450 km. However, usually 2D models are not accurate enough to support high accuracy navigation and  
35 positioning techniques in real time (e.g. Odijk 2002; Banville 2014). Additionally, they do not provide the  
36 possibility to look insight the complex coupling processes between magnetosphere, plasmasphere and ionosphere.

37 More accurate and precise positioning is achievable by considering the ionosphere as 3D medium. There are  
38 several activities in the ionosphere community aiming to describe the median ionospheric behavior by the

<sup>spell out first time</sup>  
<sup>Surely a 2D/3D model doesn't enable investigation of magnetospheric coupling. You need a full physics model for that. 2/D instead impacts bottomsides ionospheric uses such as HF propagation.</sup>

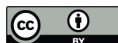

39 development of 3D electron density models based on long-term historical data. Two widely used models are the  
40 International Reference Ionosphere model (IRI, cf. Bilitza et al., 2011) and the NeQuick model (cf. Nava et al.,  
41 2008).

42 Since those models represent a median behavior, it is essential to update them by the assimilation of actual  
43 ionospheric measurements. There is a variety of approaches developed and validated for the ionospheric  
44 reconstruction by combination of actual observations with an empirical or a physical background model.  
45 Hernandez-Pajares et al. (1999) present one of the first GNSS-based data-driven tomographic models which  
46 considers the ionosphere as a grid of three-dimensional voxels and the electron density within each voxel is  
47 computed as a random walk time series. The voxel-based discretisation of the ionosphere is used for instance in  
48 Heise et al., 2002; Wen et al., 2007; Gerzen and Minkwitz, 2016, Gerzen et al., 2017, Wen et al., 2020. These  
49 authors reconstruct the 3D ionosphere by algebraic iterative methods. An alternative is to estimate the electron  
50 density as a linear combination of smooth and continuous basis functions, like e.g. spherical harmonics (SPH)  
51 (Schaer 1999), B-splines (Schmidt et al., 2008; Zeilhofer, 2008; Zeilhofer et al., 2010; Olivares-Pulido et al., 2019),  
52 B-splines and trigonometric B-splines (Schmidt et al. 2015), B-splines and Chapman functions (Liang et al., 2015  
53 and 2016), and empirical orthogonal functions and spherical harmonics (Howe et al., 1998).

54 Besides the algebraic methods, also techniques taking benefit of information on spatial and temporal covariance  
55 information, such as Optimal Interpolation, Kalman Filter, three- and four-dimensional variational techniques and  
56 Kriging, are applied to update the modelled electron density distributions, cf. Howe et al., 1998; Angling et al.,  
57 2008; Minkwitz et al., 2015 and 2016; Nikoukar et al., 2015; Olivares-Pulido et al., 2019.

58 Moreover, there are approaches based on physical models, which combine the estimation of the electron density  
59 with physical related variables such as neutral winds or the oxygen/nitrogen ratio (cf. Wang, et al. 2004; Scherliess  
60 et al., 2009; Lee et al., 2012; Lomidze et al., 2015; Schunk, et al., 2004 and 2016; Elvidge and Angling, 2019).

61 In general, the majority of data, available for the reconstruction of the ionosphere and plasmasphere, are Slant  
62 Total Electron Content (STEC) measurements, i.e. the integral of the electron density along the line of sight  
63 between the GNSS satellite and receiver. Often, STEC measurements provide limited vertical information and  
64 hence the modelling of the vertical the electron density distribution is hampered (Dettmering, 2003).

65 The estimation of the topside ionosphere and plasmasphere poses a particular difficulty since direct electron  
66 density measurements are rare and since low plasma densities at these high altitudes contribute only marginally to  
67 the STEC measurements. ~~E~~Especially, ~~G~~Ground-based STEC measurements are dominated by electron densities  
68 within and below the characteristic F2 layer peak. Consequently, information about the plasmasphere ~~can be hardly~~ *is difficult to*  
69 ~~extracted~~ *extracted* from ground-based STEC measurements, cf. e.g. Spencer and Mitchell, 2011. Thus, in ~~the presented~~ *this*  
70 work, we concentrate on the modeling of the topside ~~part~~ *part* of the ionosphere and plasmasphere and utilize only ~~the~~  
71 space-based STEC measurements.

72 In this paper, we introduce an Ensemble Kalman Filter to estimate the topside ionosphere and plasmasphere based  
73 on space-based STEC measurements. The propagation of the analyzed state vector to the next time step within a  
74 Kalman Filter is a ~~key point~~ *key challenge*. The majority of the approaches, working with EnKF variants, use ~~physic-based~~  
75 models for the propagation step (cf. e.g. Elvidge and Angling 2019; Codrescu et al., 2018; Lee et al., 2012). In  
76 our work, we investigate the question how the propagation step can be realized, if a physical model is not available  
77 or if the usage of a physical model is rejected as computational ~~time consuming~~ *time consuming*. We discretize the ionosphere and  
78 the plasmasphere below the GNSS orbit height by 3D voxels, initialize them with electron densities calculated by  
79 the NeQuick model and update them with respect to the data. We present different methods how to perform the



80 propagation step and assess their suitability for the estimation of electron density. For this purpose, a case study  
81 over quiet and perturbed ionospheric conditions in 2015 is conducted, investigating the capability of the  
82 estimations to reproduce assimilated STEC as well as to reconstruct independent STEC and electron density  
83 measurements.

84 We organize the paper as follows: Section 2 describes the EnKF with the different propagation methods and the  
85 generation of the initial ensembles by the NeQuick model. Section 3 outlines the validation scenario with the  
86 applied data sets and Section 4 presents the obtained results. Finally, we conclude our work in Section 5 and provide  
87 an outlook on the next steps.

## 88 2 Estimation of the topside ionosphere and plasmasphere by EnKF

### 89 2.1 Formulation of the underlying inverse problem

90 The information about the slant total electron content (STEC), along the satellite-to-receiver ray path  $s$  can be  
91 obtained from multi-frequency GNSS measurements. ~~In detail,~~ <sup>The</sup> STEC is a function of the electron density  $Ne$   
92 along the ray path  $s$ , given by

$$93 \quad STEC_s = \int Ne(h, \lambda, \varphi) ds, \quad (1)$$

94 where  $Ne(h, \lambda, \varphi)$  is the unknown function describing the electron density values depending on altitude  $h$ ,  
95 geographic longitude  $\lambda$  and latitude  $\varphi$ .

96 The discretization of the ionosphere by a 3D grid and the assumption of a constant electron density function within  
97 a fixed voxel allows ~~us~~ the transformation of Eq. (1) into a linear system of equations

$$98 \quad STEC_s \approx \sum_{i=1}^K Ne_i \cdot h_{si} \Rightarrow y = Hx + r, \quad (2)$$

(1 would split these over  
2 lines to make it easier to read)

99 where  $y$  is <sup>an</sup> ~~the~~  $(m \times 1)$  vector of the STEC measurements,  $x$  is the vector of unknown electron densities with  $x_i =$   
100  $Ne_i$  equals the electron density in the voxel  $i$ ,  $h_{si}$  is the length of the ray path  $s$  in the voxel  $i$  and  $r$  is the vector of  
101 measurement errors assumed to be Gaussian distributed with  $r \sim N(0, R)$  with expectation 0 and covariance  
102 matrix  $R$ .

### 101 2.2 Background model

102 As regularisation of the inverse problem in Eq. (2), a background model often provides the initial guess of the  
103 state vector  $x$ . In this study, we apply the NeQuick model version 2.0.2. The NeQuick model was developed at the  
104 International Centre for Theoretical Physics (ICTP) in Trieste/Italy and at the University of Graz/Austria (cf.  
105 Hochegger et al. (2000); Radicella and Leitinger (2001); Nava et al. (2008)). ~~We use~~ <sup>T</sup> the daily solar flux index  
106 F10.7, ~~it~~ <sup>it</sup> drives the NeQuick model.

### 107 2.3 Analysis step

108 We apply an EnKF to solve the inverse problem defined in Section 2.1. Evensen (1994) introduces the EnKF as  
109 an alternative to the standard Kalman Filter (KF) in order to cope with the non-linear propagation dynamics and  
110 the large dimension of the state vector and its covariance matrix. In an EnKF, a collection of realisations, called  
111 ensembles, represent the state vector  $x$  and its distribution.

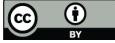

112 Let  $X^f = [x_1^f, \dots, x_k^f]$  be a  $(K \times N)$  matrix whose columns are the ensemble members, ideally following the a priori  
 113 distribution of the state vector  $x$ . Further, the observations collected in  $y$  are treated as random variables. Therefore,  
 114 we define  $\overset{an}{N}(m \times N)$  ensemble of observations  $Y = [y_1, y_2, \dots, y_N]$   $\in$  with  $y_i = y + \epsilon_i$  and a random vector  $\epsilon_i$   
 115 from the normal distribution  $N(0, R)$ .

116 We define the ensemble covariance matrix around the ensemble mean  $E(X^f) = \frac{1}{N} \sum_{j=1}^N x_j^f$  as follows:

$$P^f = \frac{1}{N-1} \sum_{j=1}^N \left\{ (x_j^f - E(X^f)) \cdot (x_j^f - E(X^f))^T \right\}. \quad (3)$$

117 In the analysis step of the EnKF, the a priori knowledge on the state vector  $x$  and its covariance matrix is updated  
 118 by

$$X^a = X^f + P^f H^T (R + H P^f H^T)^{-1} \cdot (Y - H X^f), \quad (4)$$

119 where the matrix  $X^a$  represents the a posteriori ensembles and hence the a posteriori state vector.

120 For the propagation of the analysed solution to the next time step, we test different propagation models described  
 121 in Section 2.4. In order to generate the initial ensembles  $X^f(t_0)$  we use the NeQuick model and describe the  
 122 procedure in Section 2.5. Keeping in mind that we have to deal with ~~an huge~~ <sup>extremely large</sup> state vector (details are presented in  
 123 Section 3.1), the big advantage of the EnKF, for the present study, is that there is no need for explicitly calculation  
 124 of the ensemble covariance matrix (cf. Eq. (3)). Instead, to perform the analysis step in Eq. (4) we follow the  
 125 implementation suggested by Evensen (2003).

## 126 2.4 Considered models for the propagation step

127 In this section, we introduce the different models investigated to propagate the analysed solution to the next time  
 128 step. With all of them, we propagate the ensembles 20 minutes in time. These propagation models can be generally  
 129 described as  $X^f(t_{n+1}) = F(X^a(t_n)) + W_F(t_{n+1}) + \Omega_F(t_{n+1})$ .

130 We applied different approaches to model  $F$ , the systematic error  $W_F$  and the process noise  $\Omega_F$  and present in this  
 131 paper a selection of the most promising variants of them.

### 132 2.4.1 Method 1: Rotation

133 The method Rotation assumes that in magnetic coordinates, the ionosphere remains invariant in space while Earth  
 134 rotates below it (cf. Angling and Cannon, 2004). Thus, we propagate the analysed ensemble  $X^a(t_n)$  from time  $t_n$   
 135 to the next time step  $t_{n+1}$  by:

$$X^f(t_{n+1}) = Rot(X^a(t_n)) + W_{rot}(t_{n+1}). \quad (5)$$

136 ~~In detail,~~ To calculate  $Rot(X^a(t_n))$  the magnetic longitude is changed corresponding to the evolution time  $\Delta t =$   
 137  $t_{n+1} - t_n$ , i.e. 5 degree of longitude per 20 minutes.  $W_{rot}$  denotes the systematic error introduced by approximation  
 138 of the true propagation of  $X^f$  by a simple rotation. We tested here the following estimation of  $W_{rot}$ :

$$W_{rot}(t_{n+1}) = \overset{split\ over\ 2\ lines}{ratio_{rot}(t_{n+1})} \cdot E(Rot(X^a(t_n))) \cdot \epsilon_{1 \times N} \text{ and } ratio_{rot}(t_{n+1}) = \frac{(x^b(t_{n+1}) - Rot(x^b(t_n)))}{3 \cdot Rot(x^b(t_n))}, \quad (6)$$

139 where  $x^b$  is the electron density vector calculated by the NeQuick model and  $\epsilon_{1 \times N}$  is an 1-by- $N$  matrix of ones.

140 The division in the second equation is ~~an~~ element-wise ~~one~~.





141 **2.4.2 Method 2: Exponential decay**

142 Here we assume the electron density differences between the voxels of the analysis and the background model to  
 143 be a first order Gauss-Markov sequence. These differences are propagated in time by an exponential decay function  
 144 (cf. Nikoukar et al. 2015, Bust and Mitchell, 2008; Gerzen et al., 2015)

$$X^f(t_{n+1}) = X^b(t_{n+1}) \cdot \epsilon_{1 \times N} + f(t_{n+1}) \cdot [X^a(t_n) - X^b(t_n)], \quad (7)$$

145 where  $X^b(t)$  is the ensemble of electron density vectors calculated by the NeQuick model for the time  $t$  as  
 146 described in Section 2.5;  $f(t_{n+1}) = \exp\left(-\frac{\Delta t}{\tau}\right)$ ;  $\Delta t = t_{n+1} - t_n$ ;  $\tau$  denotes the temporal correlation parameter  
 147 chosen here as 3 hours.

148 Note: Similar to the method described here, we tested also the application of  $Rot([X^a(t_n) - X^b(t_n)])$  instead of  
 149  $[X^a(t_n) - X^b(t_n)]$  in Eq. (7). The results were similar and are therefore not presented here.

150 **2.4.3 Method 3: Rotation with exponential decay**

151 *For the* As third method, we define the propagation model as a combination of the propagation models described in the  
 152 previous subsections, in particular

$$X^f(t_{n+1}) = x^b(t_{n+1}) \cdot \epsilon_{1 \times N} + f(t_{n+1}) \cdot Rot([X^a(t_n) - x^b(t_n) \cdot \epsilon_{1 \times N}]) + W(t_{n+1}) + \sqrt{\frac{\Delta t}{20}} \cdot \Omega_{exp}(t_{n+1}). \quad (8)$$

153 The systematic error  $W$  is estimated as *why 3/10?*

$$W(t_{n+1}) = f(t_{n+1}) \cdot \frac{3}{10} \cdot W_{rot}(t_{n+1}). \quad (9)$$

154 Thereby  $f$  and  $W_{rot}$  are defined as in the two *previous* sections ~~below~~. The process noise  $\Omega_{exp}$  is assumed to be white with  
 155  $\Omega_{exp}(t_{n+1}) = f(t_{n+1}) \cdot \Omega_{rot}(t_{n+1}) + (1 - f(t_{n+1})) \cdot Q_{exp}(t_{n+1})$ . Here the matrix  $\Omega_{rot}$  consists of random  
 156 realizations of the distribution  $N(0, \Sigma^{rot})$  with

$$\Sigma_{ii}^{rot}(t_{n+1}) = \left( ratio_i \cdot \left\{ E \left( Rot(X^a(t_n)) \right) \right\}_i \right)^2, \quad (10)$$

157 where  $ratio_i$  increases continuously depending on the altitude of the voxel  $i$  from  $\frac{0.5}{100}$  for lower altitudes to  $\frac{1}{100}$  for  
 158 the higher altitudes;  $E \left( Rot(X^a(t_n)) \right)$  denotes the ensemble mean vector. The equations (8) and (10) can be  
 159 interpreted as follows: for the chosen time step of 20 minutes, the standard deviation of the time model error

160 regarding the voxel  $i$  is equal to  $\sqrt{\Sigma_{ii}^{rot}(t_{n+1})} = ratio_i \cdot \left\{ E \left( Rot(X^a(t_n)) \right) \right\}_i$ , varying between 0.5% and 1% of  
 161 the corresponding analyzed electron density in the voxel  $i$ . *In details, We* generate at each time step a new  
 162 vector  $\rho_i \sim N(0,1)$  with  $\dim(\rho_i) = 100 \times 1$  and calculate *to calculate* the  $i$ -th row  $\omega_i^{rot}$  of  $\Omega_{rot}$  by

$$\omega_i^{rot}(t_{n+1}) = \sqrt{\Sigma_{ii}(\Omega_{rot}(t_{n+1}))} \cdot \rho_i(t_{n+1})^T. \quad (11)$$

163 The matrix  $Q_{exp}(t_{n+1})$  consists of random realizations (different for each time step) consistent with the a priori  
 164 covariance matrix  $L$  of the errors of the background  $x^b(t_{n+1})$  (cf. Howe and Runciman, 1998). *In details, We* The a  
 165 priori covariance is assumed to be diagonal and  $L_{ii}$  equals the square of 1% of the corresponding background  
 166 model value. Then the  $i$ -th row of  $Q_{exp}$  is calculated by Eq. (12):

$$q_i(t_{n+1}) = \sqrt{L_{ii}(t_{n+1})} \cdot \rho_i(t_{n+1})^T. \quad (12)$$

*I'm not sure where the matrix L has come from? Is the variable important or are you just giving the covar. matrix a name?*



## 167 2.5 Generation of the ensembles

168 In order to generate the ensembles we vary the F10.7 input parameter of the NeQuick model (cf. Section 2.2).  
169 First, we analysed the sensitivity of the NeQuick model on F10.7. Based on the results, we calculate a vector  
170  $\mathbf{F10.7}(t)$  of the solar radio flux index with  $\dim(\mathbf{F10.7}(t)) = 100 \times 1$  and  $\mathbf{F10.7}(t) \sim N\left(\mathbf{F10.7}(t), \frac{3}{100}\right)$   
171  $\mathbf{F10.7}(t)$  at time  $t$ . The vector  $\mathbf{F10.7}$  serves as input for the NeQuick model to calculate the 100 ensembles of  
172  $X^b$  during the considered period and the initial guess of the electron densities  $X^f(t_0)$ .

173 An example on the variation of the generated ensembles is provided by **Figure 1**. <sup>in</sup>Particularly, we show in this  
174 figure the distribution of the differences between the ensemble of electron densities  $X^b(t)$  and the NeQuick model  
175 values for DOYs 041 and 076. The residuals are depicted for a selected altitude and chosen UT times, presented  
176 through different colors (cf. subfigure history). In addition, the mean, the standard deviation (STD) and the root  
177 mean square (RMS) of the residuals are presented in the subplots.

- why this value?  
- what is the impact at low SSAs?  
If  $F_{10.7} = 70$  then the std. dev. generated by this is only 2.1. This variation of  $F_{10.7}$  in NeQuick would have very little impact.

This doesn't generate much variability in the ensemble. Do you envision this is a problem?

## 178 3 Validation scenario

179 Within this study, the EnKF with the different propagation methods is applied and validated for the tomography  
180 of the topside ionosphere and plasmasphere. ~~Particularly,~~ Two periods with quiet (DOY 041-059, 2015) and  
181 perturbed (DOY 074-079, 2015) ionospheric conditions are analysed. In this scope, we investigate the ability to  
182 reproduce assimilated STEC as well as to estimate independent STEC measurements and in-situ electron density  
183 measurements of the Swarm Langmuir Probes (LP).

184 In addition, we apply the tomography approach SMART+ (Gerzen and Minkwitz, 2016 and Gerzen et al., 2017)  
185 to provide a benchmark. For SMART+ the number of iterations at each time step is set to 25 and the correlation  
186 coefficients are chosen as described in Gerzen and Minkwitz (2016).

at least a couple of lines of description of SMART+ would be useful for the reader. Especially how the propagation works!

### 187 3.1 Reconstruction area

188 We estimate the electron density over the entire globe with a spatial resolution of 2.5 degrees in latitude and  
189 longitude. Altitudes between 430 km and 20 200 km are reconstructed where the resolution equals 30 km for  
190 altitudes from 430 km to 1000 km and decreases exponentially with increasing altitude for altitudes above 1000  
191 km, i.e. in total 42 altitudes. Consequently, the number of unknowns is  $K = 217728$ . The temporal resolution is  
192 set to 20 minutes.

### 193 3.2 Ionospheric conditions in the considered periods

194 We use the solar radio flux F10.7, the global planetary 3h index Kp and the geomagnetic disturbance storm time  
195 (DST) index to characterize the ionospheric conditions during the periods of DOY 041-059 and DOY 074-079  
196 2015. In the February period (DOY 041-059, 2015) the ionosphere is evaluated as quiet with F10.7 between 108  
197 and 137 sfu, a Kp index below 6 and DST values between 20 and -60 nT. The 17-th of March (DOY 076) 2015 is  
198 known as the St. Patrick's Day storm. The F10.7 value equals ~116 sfu on DOY 075 and ~113 sfu on DOY 076,  
199 the Kp index is below 5 on DOY 075 and increases to 8 on DOY 076; DST drops down to -200nT on DOY 076.

How often above, e.g., 4? I wouldn't call that particularly quiet.



### 200 3.3 Data

#### 201 3.3.1 STEC measurements

202 As input for the tomography approaches and for the validation, we use space-based calibrated STEC measurements  
203 of the following satellite missions: COSMIC satellites, Swarm satellites, TerraSAR-X, MetOpA and MetOpB,  
204 GRACE LEO satellites. Please note that in 2015, the orbit height of the COSMIC and MetOp satellites is ~800  
205 km, the orbit height of the Swarm B and TerraSAR-X satellites is ~500 km and the one of the Swarm C satellite  
206 ~460 km. The STEC measurements of Swarm A and GRACE are used only for the validation.

207 The STEC measurements of the Swarm satellites are acquired from <https://swarm-diss.eo.esa.int/> and the STEC  
208 measurements of the other satellite missions are downloaded from <http://cdaac->  
209 [www.cosmic.ucar.edu/cdaac/tar/rest.html](http://www.cosmic.ucar.edu/cdaac/tar/rest.html). Both data providers supply also information on the accuracy of the  
210 STEC data. We utilize this information to fill the covariance matrix  $R$  of the measurement errors.

reference for each?

altitude for these?

accuracy?  
or is it error?

#### 211 3.3.2 In-situ electron density measurements from the Swarm Langmuir Probes

212 The LPs on board the Swarm satellites provide in-situ electron density measurements with a time resolution of 2  
213 Hz. For the present study, the LP in-situ data are retrieved required from <https://swarm-diss.eo.esa.int/>. Further, information  
214 on the pre-processing of the LP data is made available at the previous web address

215 Lomidze et. al (2018) assess the accuracy and reliability of the LP data (December 2013 to June 2016) by nearly  
216 coincident measurements from low- and middle-latitude incoherent scatter radars, low-latitude ionosondes, and  
217 COSMIC satellites, which cover all latitudes. The comparison results for each Swarm satellite are consistent across  
218 these different measurement techniques. The results show that the Swarm LPs underestimate the electron density  
219 systematically by about 10%.

## 220 4 Results

221 In this section, the different methods are presented with the following color code: blue for the method Rotation,  
222 green for the method Exponential decay, light blue for the method Rotation with exponential decay, magenta for  
223 NeQuick and red for SMART+. The legends in the figures are the following: “Rot” for the method Rotation, “Exp”  
224 for the method Exponential decay, “Rot and Exp” for the method Rotation with exponential decay.

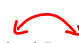

### 225 4.1 Reconstructed electron densities

226 At the end of each EnKF analysis step, we have, for each of the considered methods, 100 ensembles representing  
227 the electron density values within the voxels. The EnKF reconstructed electron densities are then calculated as the  
228 ensemble mean. The top subplots of **Figure 2** present the electron densities at DOY 076, 19:00 UT, reconstructed  
229 by the method Rotation with exponential decay. The left hand side subplot shows horizontal layers of the topside  
230 ionosphere at different heights between 490 and 827 km. The right hand side subplot shows the plasmasphere for  
231 altitudes between 827 and 2400 km at chosen longitudes. The bottom line subplots show the vertical TEC maps  
232 deduced from the 3D electron density in the considered altitude range between 430 and 20200 km for the same  
233 time stamp. The left hand side subplot show the reconstructed values and the right hand side VTEC is deduced  
234 from the NeQuick model calculated electron density. The reconstructed results are a bit higher than NeQuick ones.

can I check that  
this plot has had  
data assimilated  
up to 1840 and then  
propagated forward  
by 20 mins  
using the Rot+Exp  
method?

some more description needed here.



235 **Figure 3** displays method Rotation reconstructed electron density layers at different heights between 490 and 827  
236 km (left) and vertical TEC map deduced from the reconstructed 3D electron density in the altitude range between  
237 430 and 20200 km (right) for the same DOY 076, at 19:00 UT. The method Rotation delivers much higher values  
238 than NeQuick. All reconstructed values seems to be plausible, showing as expected the crest region, low electron  
239 densities in the Polar regions, etc.

again, some more description of differences would help guide the reader. Alternatively you could plot the differences between the two methods.

#### 240 4.2 Plausibility check by comparison with assimilated STEC

241 In this <sup>Section</sup> ~~chapter~~, we check the ability of the methods to reproduce the assimilated STEC measurements. For that  
242 purpose, we calculate STEC along a ray path  $j$ , for all ray path geometries, using the estimated 3D electron  
243 densities, denoted as  $STEC_j^{est}$ , and compare them with the measured STEC,  $STEC_j^{meas}$ , used for the  
244 reconstruction. Then the mean deviation  $\Delta STEC$  between the measurements  $STEC_j^{meas}$  and the estimate  $STEC_j^{est}$   
245 is calculated for each of the considered methods according to

$$\Delta STEC(t_n) = \frac{1}{m} \sum_{j=1}^m (|STEC_j^{meas}(t_n) - STEC_j^{est}(t_n)|), \quad (13)$$

246 where  $m$  = number of assimilated measurements.  $\Delta STEC$  is calculated at each epoch  $t_n$ . In terms of the notation  
247 used for the Eqs. (1) - (4), we can reformulate the above formula for the mean deviation as

$$\Delta STEC(t_n) = \frac{1}{m} \sum_{j=1}^m (|y_j(t_n) - E(X_a(t_n))^T \cdot H_j|), \text{ with } H_j = j\text{-th row of } H. \quad (14)$$

move to separate line

248 Further, we consider the **RMS** of the deviations, in detail

$$RMS(t_n) = \sqrt{\frac{1}{m} \sum_{j=1}^m (|STEC_j^{meas}(t_n) - STEC_j^{est}(t_n)|)^2}. \quad (15)$$

249 To calculate  $\Delta STEC$  and **RMS**, the same measurements are used as for the reconstruction. In this sense, the results  
250 presented in **Figure 4 - Figure 8** can serve as a plausibility check, testing the ability of the methods to reproduce  
251 the assimilated TEC.

252 **Figure 4** depicts the distribution of the residuals, left subfigure for the quiet period, right subfigure for the  
253 perturbed period. The corresponding residual median, standard deviation (STD) and root mean square (RMS)  
254 values are also presented in the figure. It is worth to mention here that during the quiet period, the measured STEC  
255 is below 150 TECU. For all DOYs of the perturbed period, except DOY 076, the measured STEC is below ~130  
256 TECU. On DOY 076, the STEC values rise up to 370 TECU.

257 The NeQuick model seems to underestimate the measured topside ionosphere and plasmasphere STEC during both  
258 periods. During both periods, SMART+ seems to perform best, followed by the method Rotation. However, the  
259 last one produces higher STD and RMS values. Compared to the NeQuick residuals, SMART+ is able to reduce  
260 the median of the residuals by up to 86% during the perturbed and up to 79% during the quiet period. The RMS is  
261 reduced by up to 48% and the STD by up to 41%. Rotation reduces the NeQuick median by up to 83%, the RMS  
262 by up to 27%, the STD value is almost on the same level as for NeQuick. The method Exponential decay is able  
263 to decrease the median of the NeQuick residuals by up to 54%, the RMS by up to 25%, and the STD values by up  
264 to 13%. The method Rotation with exponential decay performs similar to the NeQuick model.

265 Interestingly, the median values are higher during the quiet period, while during the perturbed period the RMS and  
266 STD values are significantly higher. The reason therefore is probably that the assimilated STEC values have in

Why does the method of time propagation have such an impact on the results? Wouldn't we expect the DA to dominate?

this seems surprising, I expected the method to do better. Perhaps more discussion needed as why this is.



267 average lower magnitude during the days in the perturbed period, compared to those during the quiet period (which  
268 explains the lower median), except the storm DOY 076, while on DOY 076 they are significantly higher (which  
269 explains the higher STD and RMS).

270 **Figure 5** and **Figure 6** plot  $\Delta STEC$  values versus time for the selected periods. Noticeable is the increase of  
271  $\Delta STEC$  during the storm on DOY 76. On the rest of the period,  $\Delta STEC$  is below eight TECU. During both periods,  
272 SMART+ generates the lowest  $\Delta STEC$  values.  $\Delta STEC$  of the methods Rotation and Exponential decay are in most  
273 of the cases higher than SMART+ delta STEC values and lower than the NeQuick model.  $\Delta STEC$  of the method  
274 Rotation with exponential decay is similar to the NeQuick model.

275 **Figure 7** and **Figure 8** present the distribution of  $\Delta STEC$  and the *RMS* error (cf. Eq. (14)) for the quiet and  
276 perturbed periods respectively. **Figure 7** confirms the conclusions we draw so far from **Figure 4** and **Figure 5**.  
277 SMART+ delivers the lowest  $\Delta STEC$  and *RMS* values, followed by the method Rotation and then by the method  
278 Exponential decay. Rotation with exponential decay performs similar to the NeQuick model. For the perturbed  
279 period, again SMART+ delivers the lowest  $\Delta STEC$  and *RMS* statistics, followed by the Exponential decay and  
280 the Rotation with similar results.

#### 281 4.3 Validation with independent space-based STEC data

282 In order to validate the methods with respect to their capability to estimate independent STEC, the LEO satellites  
283 Swarm A and GRACE <sup>have been used.</sup> ~~are chosen.~~ The STEC measurements of these satellites are not assimilated by the tested  
284 methods. It is to mention here that 2015 the Swarm A satellite was flying site on site with the Swarm C satellite at  
285 around 460 km height. The height of the GRACE orbit was around 450 km. All satellites were flying <sup>at</sup> ~~on~~ almost  
286 polar orbits.

I mentioned discussing this earlier.

287 For each of the <sup>three</sup> ~~two~~ LEOs, the residuals between  $STEC^{meas}$  and  $STEC^{est}$  are calculated and denoted as  $dTEC =$   
288  $STEC^{meas} - STEC^{est}$ . Further, the absolute values of the residuals  $|dTEC|$  are considered.

289 In general, for the quiet period, the STEC measurements of Swarm A vary below 105 TECU and for the second  
290 period below 170 TECU. For the GRACE satellite, the STEC measurements are below 282 TECU for the quiet  
291 period and below 264 TECU for the second period.

292 **Figure 9** and **Figure 10** display the histograms of the STEC residuals during the quiet period for Swarm A and  
293 GRACE respectively. Presented are the distributions of the residuals  $dTEC$  and the absolute residuals  $|dTEC|$ .  
294 Also plotted are the median, STD and RMS of the corresponding residuals. **Figure 11** and **Figure 12** depict the  
295 histograms of the STEC residuals during the perturbed period.

296 Again, the NeQuick model seems to underestimate the measured STEC during both periods for GRACE and  
297 Swarm A satellites. Compared to the NeQuick model, during both periods, the methods SMART+ and Exponential  
298 decay decrease the residuals and the absolute residuals between measured and estimated STEC for both GRACE  
299 and Swarm A satellites. The method <sup>Rotation</sup> ~~with exponential decay~~ performs for both periods very similar to the  
300 NeQuick model. The performance of the <sup>Rotation</sup> ~~with exponential decay~~ is partly even worse than the one of the background  
301 model. Our impression is that the number and the distribution of the assimilated measurements is too small and  
302 angle limited to be sufficient to dispense with a background model, as is the case with the Rotation method, which  
303 uses the model only for the estimation of the systematic error.



304 Regarding the STEC of Swarm A, the lowest residuals and the most reduction in comparison to the NeQuick  
305 model, are achieved by SMART+. The median and the STD of the SMART+ residuals are  $\sim 0.3$  TECU and  $\sim 3.4$   
306 TECU <sup>respectively</sup> for quiet and  $\sim 0.7$  TECU and  $\sim 7$  TECU for the perturbed period. Compared to the NeQuick model,  
307 the absolute median value is reduced up to 64% by SMART+ during the quiet and by up to 61% during the  
308 perturbed period. The STD value is decreased by up to 47% during the quiet and up to 29% during the storm  
309 period. The second lowest residuals are achieved by the Exponential decay - here the median of the residuals is  
310 around 0.2 TECU for quiet and around 0.8 TECU for the perturbed period.

311 Regarding the STEC of GRACE during the quiet period, the lowest residuals and the most reduction in comparison  
312 to background, are achieved by the Exponential decay, followed by SMART+. Exponential decay reduces the  
313 background absolute median value by up to 26% and the STD value by up to 28%. The median of the residuals is  
314 around 0.2 TECU. For SMART+, the median of the residuals is around 2.9 TECU. During the perturbed period,  
315 SMART+ reduces the absolute median at most by 17% and the STD by 9%, the Exponential decay does not reduce  
316 the absolute median, compared to NeQuick, but it reduces the absolute STD value by 23%. The median of the  
317 residuals are around -0.5 TECU for Exponential decay and around 0.8 TECU for SMART+.

318 Comparing between quiet and storm conditions, in general an increase of RMS and STD of the residuals is  
319 observable for the NeQuick model and all tomography methods regarding both satellites.

#### 320 4.4 Validation with independent LP in-situ electron densities

321 In this section, we further <sup>by what method?</sup> extend our analyses to the validation of the methods with independent LP in-situ electron  
322 densities of the three Swarm satellites. According to the locations of the LP measurements, the estimated electron  
323 density values are interpolated from the 3D electron density reconstructions. For each satellite, the measured  
324 electron density  $Ne^{meas}$  is compared to the estimated one  $Ne^{est}$ . In particular we calculate the residuals  $dNe =$   
325  $Ne^{meas} - Ne^{est}$ , the absolute residuals  $|dNe|$ , the relative residuals  $dNe_{rel} = \frac{dNe}{Ne^{meas}} \cdot 100\%$  and the absolute  
326 relative residuals  $|dNe_{rel}|$ .

327 **Figure 13** depicts the distribution of the residuals  $dNe$  for the quiet period along with the median, STD and RMS  
328 values. Each of the three subplots presents one of the Swarm satellites. In **Figure 14** the histograms of  $|dNe|$  and  
329  $|dNe_{rel}|$  are given for the same period. In **Figure 14** we do not separate the values for the different satellites,  
330 because these are similar. **Figure 15** and **Figure 16** show the corresponding histograms for the perturbed period.

331 The electron densities of the NeQuick model are in median slightly higher than the LP in-situ measurements for  
332 all three satellites during both periods. The median and STD values for the  $|dNe_{rel}|$  residuals produced by  
333 NeQuick are  $\sim 33\%$  and  $\sim 38\%$  resp. during the quiet period. For the perturbed period, we observe higher median  
334 and STD values of  $\sim 45\%$  and  $\sim 56\%$ , resp. The increase of the RMS and STD values of the absolute residuals is  
335 also visible for all the considered reconstruction methods.

336 The methods SMART+ and Rotation with exponential decay follow the trend of the model and show similar  
337 distributions in **Figure 13** and **Figure 15**. Comparing these two methods with the NeQuick model, the performance  
338 of SMART+ is slightly better reducing the median of the absolute and absolute relative residuals by up to 8%.  
339 Further, during both periods, SMART+ reduces the STD values of the  $|dNe|$  values by up to 23%. However, the  
340 STD and RMS values of the  $|dNe_{rel}|$  residuals for SMART+ during the quiet period are higher than those of the  
341 NeQuick model. The median and STD values of the  $|dNe_{rel}|$  residuals for SMART+ are  $\sim 30\%$  and  $\sim 43\%$  resp.





342 during quiet and higher during perturbed period, namely ~43% and ~53% resp. The statistics of the methods  
343 Exponential decay and Rotation are worse than those of NeQuick.

## 344 5 Summary and conclusions

345 In this paper, we focus on the assessment of three different propagation methods for an Ensemble Kalman Filter  
346 approach in the case that a physical propagation model is not available or discarded due to computational burden.  
347 We validate these methods with independent STEC observations of the satellites GRACE and Swarm A and with  
348 independent Langmuir probes data of the three Swarm satellites. The methods are compared to the algebraic  
349 reconstruction method SMART+, serving as a benchmark and to the NeQuick model for periods of the year 2015  
350 covering quiet to perturbed ionospheric conditions. This work is carrying out our first case study in this regard.

351 Overlooking all the validation results, the methods SMART+ and Exponential decay reveal the best performance  
352 with the lowest residuals. In general, the method Rotation with exponential decay follows the trends of the  
353 NeQuick model. One significant difference between the investigated reconstruction approaches is that Rotation,  
354 as the only one of considered methods, uses the background information only for the estimation of the systematic  
355 error. The number of the assimilated measurements is small compared to the number of unknowns, additionally  
356 the distribution of measurements is uneven and angle limited. We assume these are the main reasons, why the  
357 method Rotation reproduces the assimilated STEC data well, but exhibits degraded results in comparisons with  
358 independent data.

359 In summary, the comparison with the assimilated STEC show that during both periods all methods reduce  
360 successfully the median, RMS and STD values of the STEC residuals in comparison to the background model.  
361 SMART+ performs at best improving the statistics of the NeQuick model by up to 86%, followed by the method  
362 Rotation, decreasing the median of the residuals by up to 83%. The method Exponential decay lowers the median  
363 by up to 55%, but the STD values stay almost on the same level as for the NeQuick model.

364 Regarding the ability to estimate independent STEC measurements, the methods SMART+ and Exponential decay  
365 reduce the independent STEC residuals by up to 64% for Swarm A and 28% for GRACE, compared to the NeQuick  
366 model. SMART+ generates the smallest residuals for the STEC measurements of Swarm A and Exponential decay  
367 performs at best for STEC measurements of GRACE.

368 Concerning the estimation of independent electron density data, SMART+ shows the best results, reducing the  
369 background statistics of the absolute residuals by up to 23%. The median and STD values of the absolute residuals  
370  $|dN_{e_{rel}}|$  for SMART+ are ~30% and ~43% resp. during quiet and higher, namely ~43% and ~53% resp. during  
371 perturbed period. The distributions of the residuals produced by Rotation with exponential decay are similar to the  
372 ones of the NeQuick model. In general, all the considered methods generate relatively high residuals. It should be  
373 noted here that the independent electron density measurements are located at the lower edge of the reconstructed  
374 area and all the assimilated measurements are located above. Additionally, as already mentioned in Section 3.3.2,  
375 Swarm LPs was found to underestimate the true electron density systematically. This could be the second reason,  
376 why the reconstructions, based on the STEC, do not match the LPs electron densities. To get better results for the  
377 lower altitudes, it might be necessary to apply a kind of anchor point from below within the reconstruction  
378 procedure. We plan to utilise therefor the Swarm LPs electron density measurements themselves.

*But this is not one of the methods you are testing and could be significantly different in methodology to the other EnKF methods.*

*again a lot of this discussion talks about the skill and validity of SMART+. That is okay if you explicitly include SMART+ as one of the methods you want to test.*





379 Further, to get a comprehensive concluding impression of the performance of the investigated methods and to get  
380 an insight in the ability of the methods for correct characterization of the electron density profile shapes, we start  
381 to work on comparisons with independent electron density data, located in the plasmasphere and with coherent  
382 scatter radar data.

383 Furthermore, a pre-adjustment of the background model, e.g. in terms of F2 layer characteristics or the  
384 plasmopause location, may be helpful to improve the reconstruction results (cf. e.g. Bidaine and Warnant, 2010,  
385 Gerzen et. al., 2017).

#### 386 Acknowledgements

387 We thank the NOAA ([ftp://ftp.ngdc.noaa.gov/STP/GEOMAGNETIC\\_DATA/INDICES/](ftp://ftp.ngdc.noaa.gov/STP/GEOMAGNETIC_DATA/INDICES/)) and WDC Kyoto  
388 (<http://wdc.kugi.kyoto-u.ac.jp/dstdir/index.html>) for making available the geo-related data, F10.7, Kp and DST  
389 indices. We are grateful to the European Space Agency for providing the Swarm data ([https://swarm-  
390 diss.esa.int/](https://swarm-diss.esa.int/)) and to the CDAAC: COSMIC Data Analysis and Archive Center for providing the STEC data of  
391 several LEO satellites (<http://cdaac-www.cosmic.ucar.edu/cdaac/tar/rest.html>). Additionally, we express our  
392 gratitude to the Aeronomy and Radiopropagation Laboratory of the Abdus Salam International Centre for  
393 Theoretical Physics Trieste/Italy for providing the NeQuick version 2.0.2 for scientific purposes. This study was  
394 performed as part of the MuSE project (<https://gepris.dfg.de/gepris/projekt/273481272?language=en>), funded by  
395 the DFG as a part of the Priority Programme “DynamicEarth”, SPP-1788.

#### 396 References

- 397 Angling, M. J.: First assimilation of COSMIC radio occultation data into the Electron Density Assimilative Model  
398 (EDAM), *Ann. Geophys.*, 26, 353-359, 2008.
- 399 Angling, M. J. and Cannon, P. S.: Assimilation of radio occultation measurements into background ionospheric  
400 models, *Radio Sci.*, 39, RS1S08, doi:10.1029/2002RS002819, 2004.
- 401 Banville, S.: Improved convergence for GNSS precise point positioning. Ph.D. dissertation, Department of  
402 Geodesy and Geomatics Engineering, Technical Report No. 294, University of New Brunswick, Fredericton, New  
403 Brunswick, Canada, 2014.
- 404 Bidaine B. and R. Warnant: Assessment of the NeQuick model at mid-latitudes using GNSS TEC and ionosonde  
405 data, *Adv. Space Res.*, 45, 1122-1128, 2010.
- 406 Bilitza, D., L.-A. McKinnell, B. Reinisch, and T. Fuller-Rowell: The International Reference Ionosphere (IRI)  
407 today and in the future, *J. Geodesy*, 85:909-920, DOI 10.1007/s00190-010-0427-x, 2011.
- 408 Bust, G. S., and C. N. Mitchell: History, current state, and future directions of ionospheric imaging, *Rev. Geophys.*,  
409 46, RG1003, doi:10.1029/2006RG000212, 2008.
- 410 Codrescu, S. M., M. V. Codrescu, M. Fedrizzi: An Ensemble Kalman Filter for the thermosphere-ionosphere. *Space*  
411 *Weather*, 16, 57–68, <https://doi.org/10.1002/2017SW001752>, 2018.
- 412 Dettmering D.: Die Nutzung des GPS zur dreidimensionalen Ionosphärenmodellierung. PhD Thesis, University of  
413 Stuttgart, <http://elib.uni-stuttgart.de/opus/volltexte/2003/1411/>, 2003.
- 414 Elvidge, S., and M. J. Angling: Using the local ensemble Transform Kalman Filter for upper atmospheric  
415 modelling, *J. Space Weather Space Clim.*, 9, A3, <https://doi.org/10.1051/swsc/2019018>, 2019.
- 416 Evensen, G.: Sequential data assimilation with a nonlinear quasi-geostrophic model using Monte Carlo methods  
417 to forecast error statistics, *J. Geophys. Res.*, 99 (C5), 10143– 10162, doi:10.1029/94JC00572, 1994.
- 418 Evensen, G.: The Ensemble Kalman Filter: theoretical formulation and practical implementation, *Ocean Dynamics*,  
419 53, 343-367, DOI 10.1007/s10236-003-0036-9, 2003.
- 420 Howe, B. M., K Runciman, J. A. Secan, Tomography of the ionosphere: Four-dimensional simulations, *Radio Sci.*,  
421 33, 1, 109-128, 1998.
- 422 Gerzen, T., Minkwitz, D., and Schlueter, S.: Comparing different assimilation techniques for the ionospheric F2  
423 layer reconstruction, *J. Geophys. Res.-Space*, 120, 6901–6913, doi:10.1002/2015JA021067, 2015.



- 424 Gerzen, T. and D. Minkwitz, Simultaneous multiplicative column normalized method (SMART) for the 3D  
425 ionosphere tomography in comparison with other algebraic methods, *Ann. Geophys.*, 34, 97-115, doi:  
426 10.5194/angeo-34-97-2016, 2016.
- 427 Gerzen, T., V. Wilken, D. Minkwitz, M. Hoque, S. Schlüter: Three-dimensional data assimilation for ionospheric  
428 reference scenarios, *Ann. Geophys.*, 35, 203-215, doi:10.5194/angeo-35-203-2017, 2017.
- 429 Heise, S., N. Jakowski, A. Wehrenpfennig, Ch. Reigber, H. Lühr: Sounding of the topside  
430 ionosphere/plasmasphere based on GPS measurements from CHAMP: Initial results, *Geophys. Res. Letters*,  
431 29(14), doi: 10.1029/2002GL014738, 2002.
- 432 Hernandez-Pajares, M., J.M. Juan, J. Sanz: New approaches in global ionospheric determination using ground  
433 GPS data. *J Atmos Solar Terr Phys*, 61: 1237-1247, 1999.
- 434 Hoegger G., Nava B., Radicella S.M., and R. Leitinger: A Family of Ionospheric Models for Different Uses,  
435 *Phys. Chem. Earth Part C Solar Terres Planet Sci*, 25, 307-310, doi:10.1016/S1464-1917(00)00022-2, 2000.
- 436 Howe B., K. Runciman: Tomography of the ionosphere: Four-dimensional simulations, *Radio Sci.*, 33, 1, 09-128,  
437 1998.
- 438 Lee, I. T., T. Matsuo, A. D. Richmond, J. Y. Liu, W. Wang, C. H. Lin, J. L. Anderson, M. Q. Chen: Assimilation  
439 of FORMOSAT-3/COSMIC electron density profiles into a coupled thermosphere/ionosphere model using  
440 ensemble Kalman filtering, *JGR*, 117, A10, <https://doi.org/10.1029/2012JA017700>, 2012.
- 441 Liang, W., M. Limberger, M. Schmidt, D. Dettmering, U. Hugentobler, D. Bilitza, N. Jakowski, M.M. Hoque, V.  
442 Wilken, T. Gerzen: Regional modeling of ionospheric peak parameters using GNSS data - an update for IRI. *Adv*  
443 *Space Res.*, 55(8), 1981-1993, 10.1016/j.asr.2014.12.006, 2015.
- 444 Liang, W., M. Limberger, M. Schmidt, D. Dettmering, U. Hugentobler: Combination of ground- and space-based  
445 GPS data for the determination of a multi-scale regional 4-D ionosphere model. In: Rizos C., Willis P. (Eds.) *IAG*  
446 *150 Years, IAG Symposia*, 143, 751-758, 10.1007/1345\_2015\_25, 2016.
- 447 Lomidze, L., L. Scherliess, R. W. Schunk: Magnetic meridional winds in the thermosphere obtained from Global  
448 Assimilation of Ionospheric Measurements (GAIM) model, *JGR: Space Physics*, 120, 9, 8025-8044,  
449 <https://doi.org/10.1002/2015JA021098>, 2015.
- 450 Lomidze, L., D. J. Knudsen, J. Burchill, A. Kouznetsov, S. C. Buchert: Calibration and validation of Swarm plasma  
451 densities and electron temperatures using ground-based radars and satellite radio occultation measurements, *Radio*  
452 *Sci.*, 53, 15– 36, <https://doi.org/10.1002/2017RS006415>, 2018.
- 453 Minkwitz, D., K.G. van den Boogaart, T. Gerzen, M.M. Hoque: Tomography of the ionospheric electron density  
454 with geostatistical inversion, *Ann. Geophys.*, 33, 1071–1079, <https://doi.org/10.5194/angeo-33-1071-2015>, 2015.
- 455 Minkwitz, D., K. G. van den Boogaart, T. Gerzen, M. Hoque, M. Hernández-Pajares: Ionospheric tomography by  
456 gradient enhanced kriging with STEC measurements and ionosonde characteristics, *Ann. Geophys.*, 34, 999-1010,  
457 doi:10.5194/angeo-34-999-2016, 2016.
- 458 Nava B., P. Coisson, and S.M. Radicella: A new version of the NeQuick ionosphere electron density model, *J.*  
459 *Atmos. Sol-Terr. Phys.*, 70, 1856-1862, doi:10.1016/j.jastp.2008.01.015, 2008.
- 460 Nikoukar, R., G. Bust, D. Murr: Anovel data assimilation technique for the plasmasphere, *J. Geophys. Res.*,  
461 *Space Physics*, 120, 8470-8485, doi:10.1002/2015JA021455, 2015.
- 462 Odijk, D.: Precise GPS positioning in the presence of ionospheric delays. *Publications on geodesy*, Vol. 52. The  
463 Netherlands Geodetic Commission, Delft. ISBN-13: 978 90 6132 278 8, 2002.
- 464 Olivares-Pulido G., M. Terkildsen, K. Arsov, P.J.G. Teunissen, A. Khodabandeh, V. Janssen: A 4D tomographic  
465 ionospheric model to support PPP-RTK, *Journal of Geodesy*, 93, 9, 1673-1683, [https://doi.org/10.1007/s00190-](https://doi.org/10.1007/s00190-019-01276-4)  
466 [019-01276-4](https://doi.org/10.1007/s00190-019-01276-4), 2019.
- 467 Radicella S. M., and R. Leitinger: The evolution of the DGR approach to model electron density profiles, *Adv*  
468 *Space. Res.*, 27, 35-40, doi:10.1016/S0273-1177(00)00138-1, 2001.
- 469 Schaar, S.: Mapping and predicting the Earth's ionosphere using the global positioning system. Ph.D. dissertation,  
470 Astron Institute, University of Bern, Berne, 1999.
- 471 Scherliess, L., D. C. Thompson, R. W. Schunk: Ionospheric dynamics and drivers obtained from a physicsbased  
472 data assimilation model, *Radio Sci.*, 44, RS0A32, doi:10.1029/2008RS004068, 2009.
- 473 Schmidt, M., D. Bilitza, C. Shum, C. Zeilhofer: Regional 4-D modelling of the ionospheric electron density. *Adv*  
474 *Space Res* 42: 782790. <https://doi.org/10.1016/j.asr.2007.02.050>, 2008.
- 475 Schmidt, M., D. Dettmering, F. Seitz: Using B-spline expansions for ionosphere modeling. In: Freedon W., Nashed  
476 M.Z., Sonar T. (Eds.) *Handbook of Geomathematics (Second Edition)*, 939-983, Springer, 10.1007/978-3-642-  
477 54551-1\_80, 2015.
- 478 Schunk, R. W., et al.: Global Assimilation of Ionospheric Measurements (GAIM), *Radio Sci.*, 39, RS1S02,  
479 doi:10.1029/2002RS002794, 2004.



480 Schunk, R. W., L. Scherliess, V. Eccles, L. C. Gardner, J. J. Sojka, L. Zhu, X. Pi, A. J. Mannucci, M. Butala, B.  
 481 D. Wilson, A. Komjathy, C. Wang, G. Rosen: Space weather forecasting with a Multimodel Ensemble Prediction  
 482 System (MEPS), *Radio Sci.*, 51, 1157–1165, doi:10.1002/2015RS005888, 2016.  
 483 Spencer, P. S. J., C. N. Mitchell: Imaging of 3-D plasmaspheric electron density using GPS to LEO satellite  
 484 differential phase observations, *Radio Sci.*, 46, RS0D04, https://doi.org/10.1029/2010RS004565, 2011.  
 485 Wang, C., G. Hajj, X. Pi, I. G. Rosen, B. Wilson: Development of the Global Assimilative Ionospheric Model,  
 486 *Radio Sci.*, 39, RS1S06, doi:10.1029/2002RS002854, 2004.  
 487 Wen, D., Y. Yuan, J. Ou, X. Huo, K. Zhang: Three-dimensional ionospheric tomography by an improved algebraic  
 488 reconstruction technique, *GPS Solut.*, 11, 251–258, doi:10.1007/s10291-007-0055-y, 2007.  
 489 Wen, D., D. Mei, Y. Du: Adaptive Smoothness Constraint Ionospheric Tomography Algorithm, *Sensors (Basel)*,  
 490 20, 8, doi: 10.3390/s20082404, 2020.  
 491 Zeilhofer, C.: Multi-dimensional B-spline Modeling of Spatio-temporal Ionospheric Signals: DGK. Series A, 123,  
 492 München, 2008.  
 493 Zeilhofer, C., M. Schmidt, D. Bilitza, C. K. Shum: Regional 4-D modeling of the ionospheric electron density  
 494 from satellite data and IRI, *Adv. Space Res.*, 43, 2009.  
 495

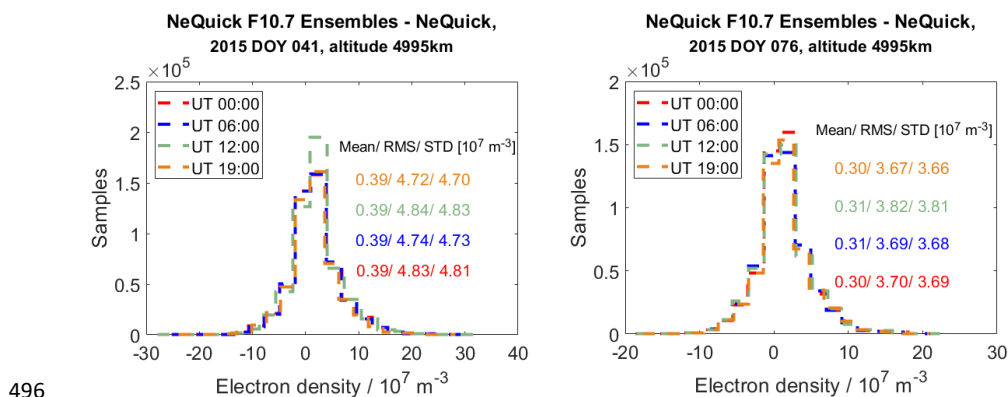

496  
 497 **Figure 1: The distribution of the ensemble residuals for a chosen altitude and selected UT times, for all**  
 498 **latitudes, longitudes. Left – for DOY 041, right – for DOY 076.**

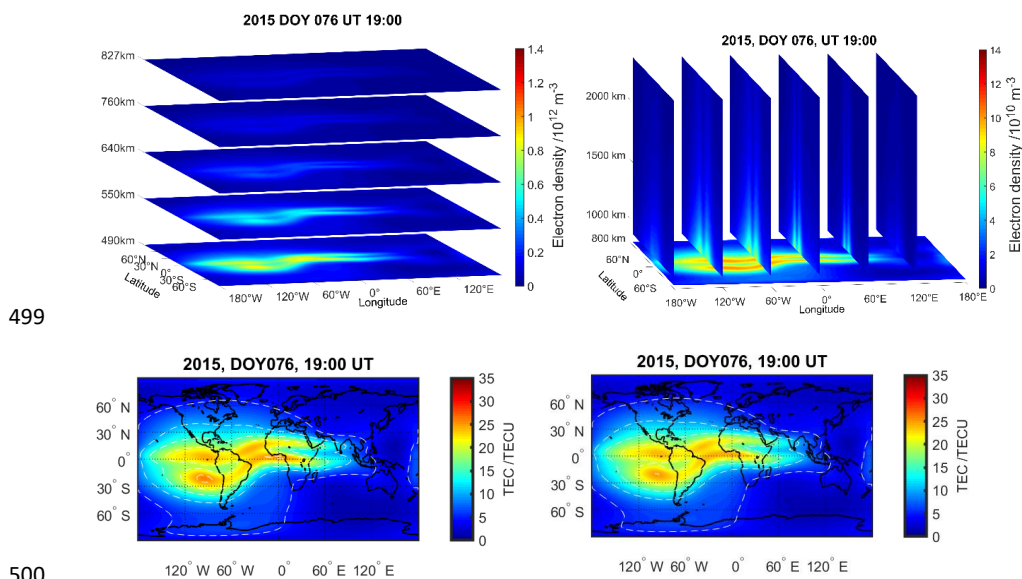

500

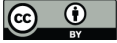

501 **Figure 2: Subfigures top: Rotation with exponential decay reconstructed electron density represented by**  
 502 **layers at different heights between 490 and 827 km (left) and at chosen longitudes for altitudes between 827**  
 503 **and 2400 km (right). Subfigures bottom: The vertical TEC map deduced from the reconstructed (left) and**  
 504 **NeQuick-modeled (right) 3D electron density in the altitude range between 450 and 20200 km.**

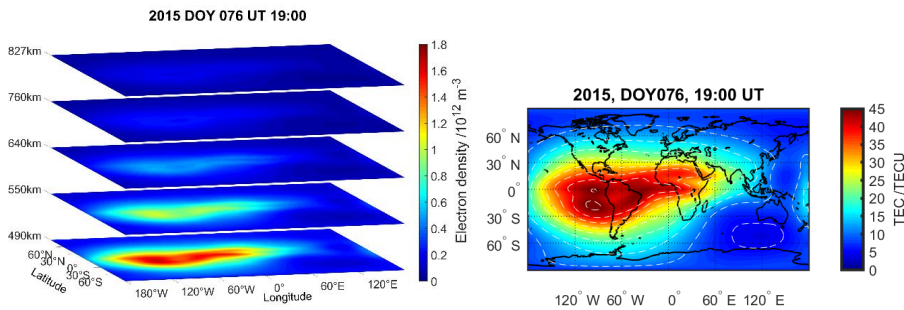

505

506 **Figure 3: Subfigures top: Method Rotation reconstructed electron density represented by layers at different**  
 507 **heights between 490 and 827 km (left) and vertical TEC map deduced from the reconstructed 3D electron**  
 508 **density in the altitude range between 450 and 20200 km (right).**

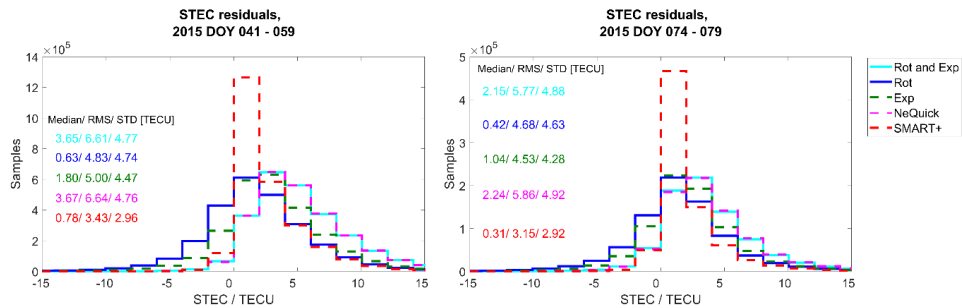

509

510 **Figure 4: Plausibility check – distributions of the STEC measured – STEC estimated residuals. Left**  
 511 **subfigure depicts residuals of the quiet period, right subfigure for the perturbed period.**

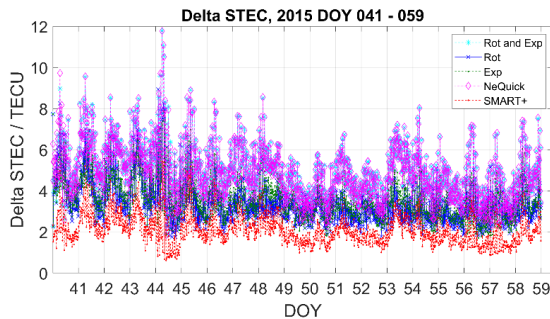

512

513 **Figure 5: Plausibility check for the quiet period –  $\Delta$ STEC values versus time.**

514

515

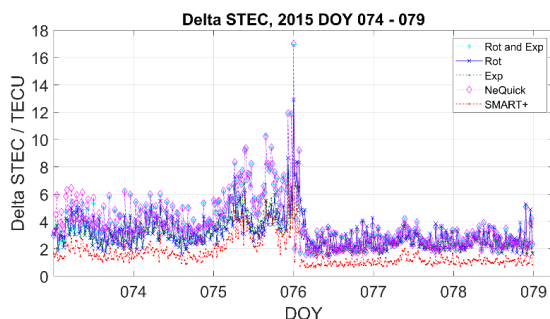

516

517 **Figure 6: Plausibility check for the perturbed period –  $\Delta$ STEC values versus time.**

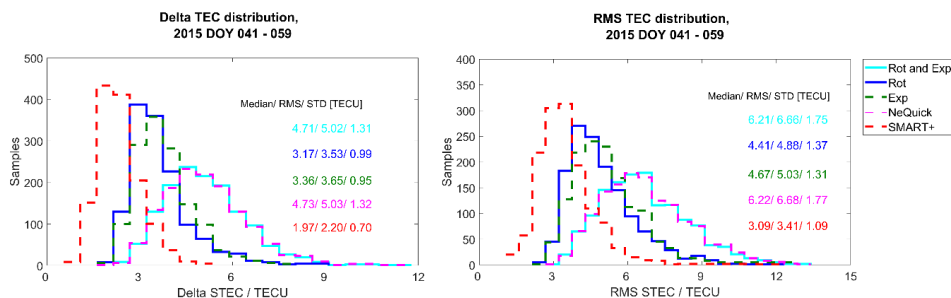

518

519 **Figure 7: Plausibility check for the quiet period – distributions of the delta TEC (left) and RMS (right)**  
 520 **values.**

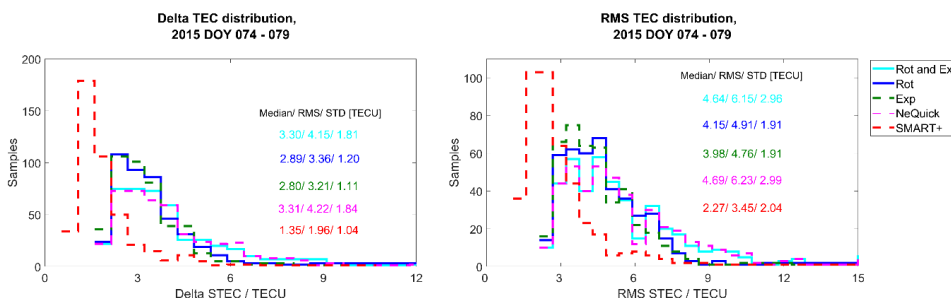

521

522 **Figure 8: Plausibility check for the perturbed period – distributions of the delta TEC (left) and RMS (right)**  
 523 **values.**

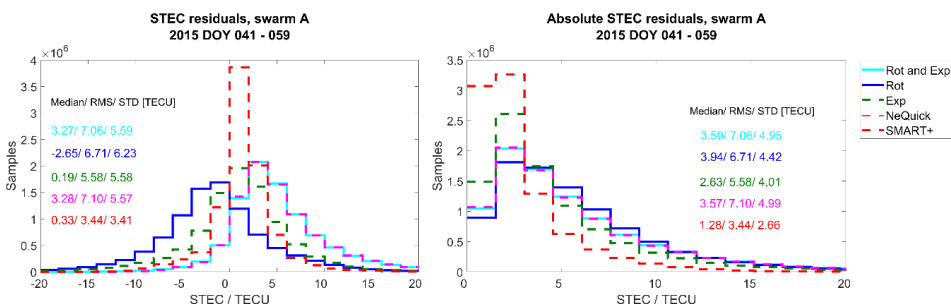

524



525 **Figure 9: Histograms of the STEC residuals (left) and absolute residuals (right) during the quiet period, for**  
 526 **Swarm A.**

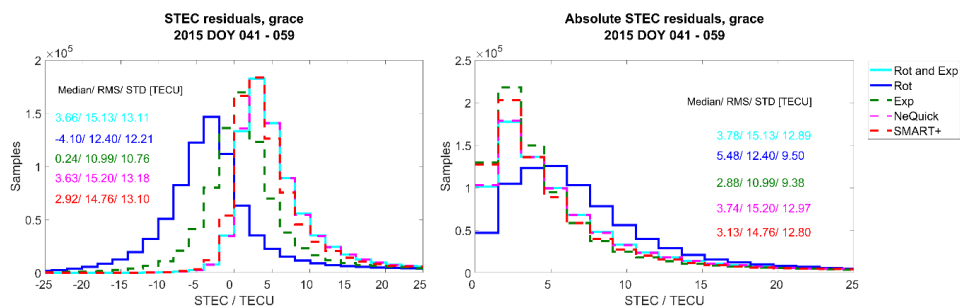

527

528 **Figure 10: Histograms of the STEC residuals (left) and absolute residuals (right) during the quiet period,**  
 529 **for GRACE.**

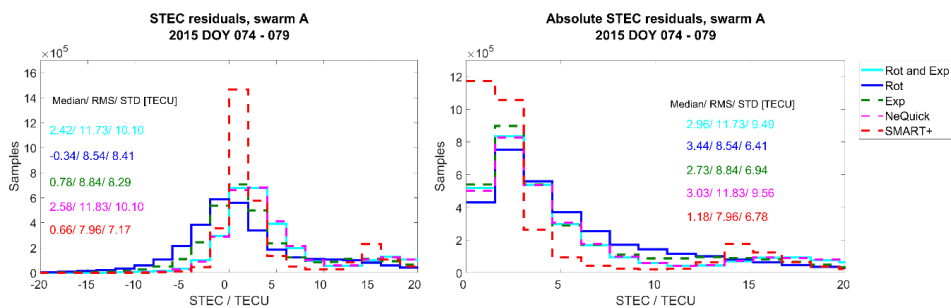

530

531 **Figure 11: Histograms of the STEC residuals (left) and absolute residuals (right) during the perturbed**  
 532 **period, for Swarm A.**

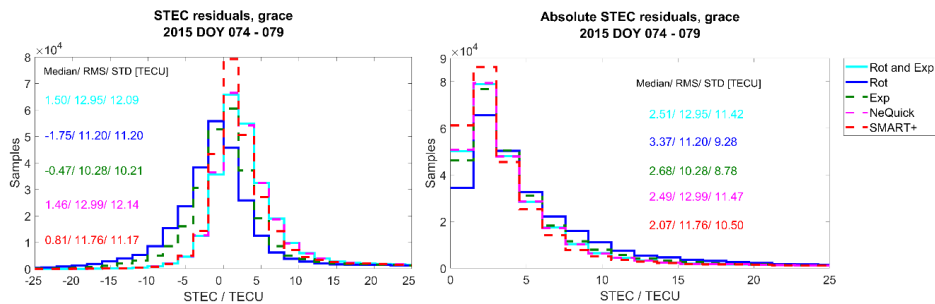

533

534 **Figure 12: Histograms of the STEC residuals (left) and absolute residuals (right) during the perturbed**  
 535 **period, for GRACE.**

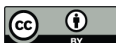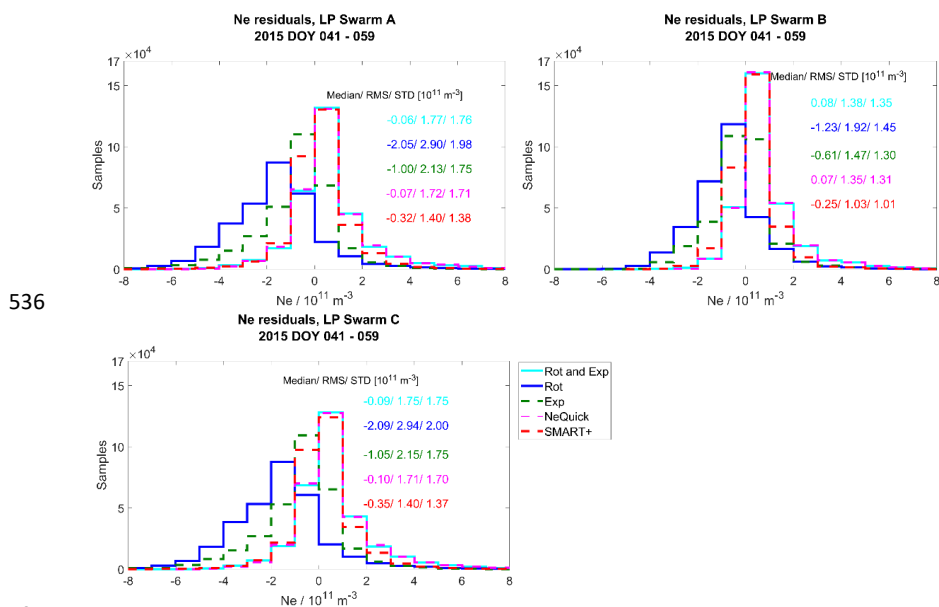

538 **Figure 13: Validation with LP data – distribution of the Swarm A, B, C (separated) electron density**  
 539 **residuals for the quiet period.**

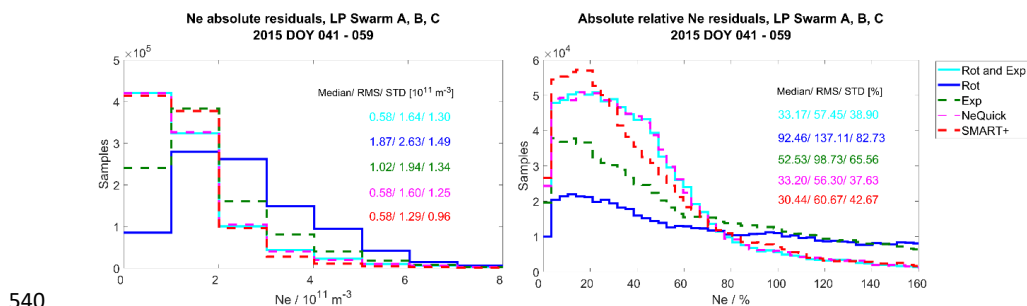

542 **Figure 14: Validation with LP data – distribution of the Swarm absolute and absolute relative electron**  
 543 **density residuals for the quiet period.**



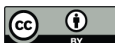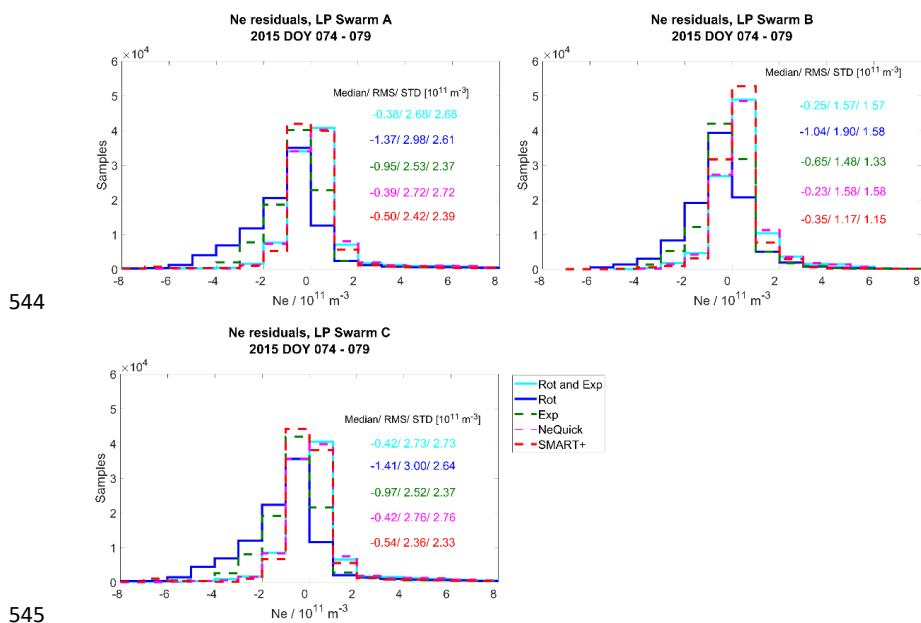

546 **Figure 15: Validation with LP data – distribution of the Swarm A, B, C (separated) electron density**  
 547 **residuals for the perturbed period.**

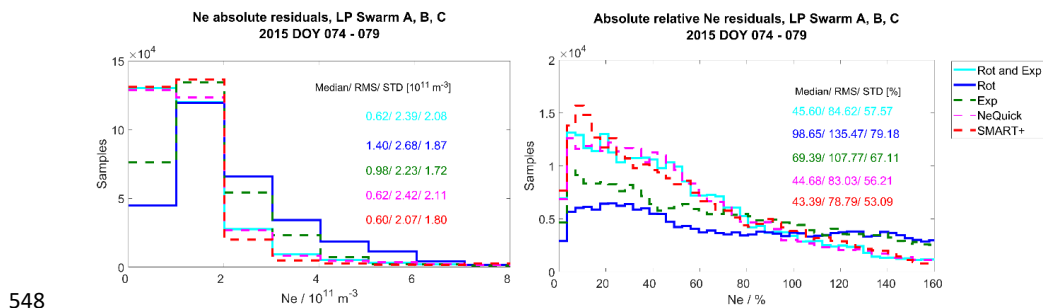

549 **Figure 16: Validation with LP data – distribution of the Swarm absolute and absolute relative electron**  
 550 **density residuals for the perturbed period.**
